# Supplementary material
Source: publisher figshare collection journal article supplement (https://f1000.figshare.com/ndownloader/files/231388)
Supplement: Supplementary file 1 [file 231388]

Plants Female x Male	Indel 1: 450919	Indel 3: 469762	Indel 4: 449053	Indel 5: 455100
vtc1-1	11 C	14 C
Col-0 x svt2 C1F1 1	12 H
H2O	13 none	16 none	19 none	22 none
Col-0 x svt2 C1F1 3		15 H
Col-0 x svt2 C1F1 2			17 H
Col-0 x svt2 C1F1 4			18 H
Col-0				20 C
svt2 x Col-0 C1F1 3				21 n.d.
